# Supplementary material for: Greenhouse Gas Emissions from a Main Tributary of the Yangtze River, Eastern China
Source: MDPI journal article supplement (doi:10.3390/su142113729), 2022-10-23
Supplement: s1 [file s1]

Table S1. Summary of ANOVA examining the effect of reaches on physical and chemical variables, GHG concentrations and fluxes during sampling period.

|                  | <i>df</i> | <b>Ta</b>                           |          | <b>Tw</b>              |          | <b>WD</b>              |          | <b>FV</b>              |          | <b>AP</b>              |          | <b>DO</b>              |          | <b>pH</b>              |          |
|------------------|-----------|-------------------------------------|----------|------------------------|----------|------------------------|----------|------------------------|----------|------------------------|----------|------------------------|----------|------------------------|----------|
|                  |           | <i>F</i>                            | <i>p</i> | <i>F</i>               | <i>p</i> | <i>F</i>               | <i>p</i> | <i>F</i>               | <i>p</i> | <i>F</i>               | <i>p</i> | <i>F</i>               | <i>p</i> | <i>F</i>               | <i>p</i> |
| <b>September</b> | 2         | 0.74                                | 0.49     | 0.54                   | 0.59     | 1.45                   | 0.26     | 1.66                   | 0.22     | 2.67                   | 0.98     | -                      | -        | 2.48                   | 0.11     |
| <b>April</b>     | 2         | 1.09                                | 0.36     | 0.13                   | 0.88     | 0.07                   | 0.93     | 0.27                   | 0.77     | 7.70                   | 0.00     | 0.23                   | 0.79     | 0.22                   | 0.81     |
| <b>All data</b>  | 2         | 0.90                                | 0.41     | 0.07                   | 0.93     | 0.56                   | 0.57     | 1.16                   | 0.33     | 9.99                   | 0.00     | 0.50                   | 0.61     | 0.32                   | 0.73     |
|                  |           | <b>NH<sub>4</sub><sup>+</sup>-N</b> |          | <b>cCO<sub>2</sub></b> |          | <b>fCO<sub>2</sub></b> |          | <b>cCH<sub>4</sub></b> |          | <b>fCH<sub>4</sub></b> |          | <b>cN<sub>2</sub>O</b> |          | <b>fN<sub>2</sub>O</b> |          |
|                  |           | <i>F</i>                            | <i>p</i> | <i>F</i>               | <i>p</i> | <i>F</i>               | <i>p</i> | <i>F</i>               | <i>p</i> | <i>F</i>               | <i>p</i> | <i>F</i>               | <i>p</i> | <i>F</i>               | <i>p</i> |
| <b>September</b> | 2         | 1.11                                | 0.35     | 2.09                   | 0.15     | 1.53                   | 0.24     | 3.56                   | 0.04     | 2.41                   | 0.12     | 4.12                   | 0.04     | 5.48                   | 0.01     |
| <b>April</b>     | 2         | 0.17                                | 0.84     | 0.13                   | 0.88     | 0.74                   | 0.49     | 0.70                   | 0.51     | 0.41                   | 0.67     | 0.80                   | 0.47     | 1.17                   | 0.33     |
| <b>All data</b>  | 2         | 0.59                                | 0.56     | 0.08                   | 0.92     | 0.05                   | 0.96     | 2.64                   | 0.09     | 1.73                   | 0.19     | 0.56                   | 0.58     | 1.03                   | 0.37     |

Note: Ta, air temperature; Tw, water temperature; WD, water depth; FV, flow velocity; AP, air pressure; DO, dissolved oxygen; NH<sub>4</sub><sup>+</sup>-N, ammonium. cCO<sub>2</sub>, cCH<sub>4</sub> and cN<sub>2</sub>O represent dissolved CO<sub>2</sub>, CH<sub>4</sub> and N<sub>2</sub>O concentrations; fCO<sub>2</sub>, fCH<sub>4</sub> and fN<sub>2</sub>O represent diffusive CO<sub>2</sub>, CH<sub>4</sub> and N<sub>2</sub>O fluxes.

Table S2. Relations between GHG concentrations and fluxes and environmental variables  
in each campaign

|           |        | $c_{CO_2}$ | $f_{CO_2}$ | $c_{CH_4}$ | $f_{CH_4}$ | $c_{N_2O}$ | $f_{N_2O}$ |
|-----------|--------|------------|------------|------------|------------|------------|------------|
| September | urban  | 0.332      | 0.102      | -0.073     | -0.073     | -0.176     | -0.171     |
|           | water  | 0.22       | -0.112     | 0.105      | 0.031      | -0.053     | -0.342     |
|           | forest | -0.124     | 0.372      | -0.231     | -0.182     | 0.448      | 0.439      |
|           | farm   | -0.113     | -0.183     | 0.42       | 0.442      | -0.443     | -0.052     |
|           | grass  | -0.103     | -0.393     | -0.257     | -0.335     | -0.18      | -0.355     |
|           | unused | 0.353      | -0.102     | 0.45       | 0.428      | -0.163     | -0.351     |
| April     | urban  | -0.049     | -0.072     | -0.007     | -0.036     | 0.051      | 0.08       |
|           | water  | -0.107     | -0.088     | 0.219      | 0.191      | -0.185     | -0.161     |
|           | forest | 0.07       | 0.48       | -0.31      | -0.276     | -0.001     | -0.102     |
|           | farm   | 0.149      | 0.156      | 0.365      | 0.359      | 0.177      | 0.248      |
|           | grass  | -0.126     | -0.072     | 0.067      | 0.062      | -0.313     | -0.248     |
|           | unused | -0.162     | -0.189     | 0.082      | 0.04       | 0.245      | 0.255      |

Table S3. Dissolved GHG concentrations in surface water and diffusive GHG emissions from the Qingyijiang River compared with other studies

| Rivers                          | Site         | Climate   | CO <sub>2</sub><br>concentration<br>( $\mu\text{M}$ ) | CO <sub>2</sub> flux<br>( $\text{mmol m}^{-2} \text{d}^{-1}$ ) | CH <sub>4</sub><br>concentration<br>( $\mu\text{M}$ ) | CH <sub>4</sub> flux<br>( $\mu\text{mol m}^{-2} \text{d}^{-1}$ ) | N <sub>2</sub> O<br>concentration<br>( $\text{nM}$ ) | N <sub>2</sub> O flux<br>( $\mu\text{mol m}^{-2} \text{d}^{-1}$ ) | References        |
|---------------------------------|--------------|-----------|-------------------------------------------------------|----------------------------------------------------------------|-------------------------------------------------------|------------------------------------------------------------------|------------------------------------------------------|-------------------------------------------------------------------|-------------------|
| Amazon River                    | Brazil       | Tropic    | -                                                     | -                                                              | 0.9                                                   | 1060                                                             | -                                                    | -                                                                 | [9]               |
| Indian rivers                   | India        | Tropic    | -                                                     | 20.1                                                           | 0.7                                                   | 300                                                              | -                                                    | -                                                                 | [53]              |
| Urban rivers in Shanghai        | China        | Subtropic | -                                                     | 565.83                                                         | -                                                     | 1164.17                                                          | -                                                    | 137.14                                                            | [35, 36]          |
| Rivers in TGR catchment         | China        | Subtropic | -                                                     | -                                                              | 1.12                                                  | 3060                                                             | -                                                    | -                                                                 | [37]              |
| Urban rivers in Tianjin         | China        | Subtropic | 35.55                                                 | 16.34                                                          | 0.80                                                  | 984                                                              | 44.57                                                | 36.46                                                             | [54]              |
| Jurong rivers                   | China        | Subtropic | 112                                                   | 409                                                            | 0.51                                                  | 1600                                                             | -                                                    | -                                                                 | [57]              |
| Urban rivers in Chongqing       | China        | Subtropic | -                                                     | 450.28                                                         | -                                                     | -                                                                | -                                                    | -                                                                 | [58]              |
| <b>Qingyijiang River</b>        | <b>China</b> | Subtropic | <b>28.17</b>                                          | <b>31.89</b>                                                   | <b>0.27</b>                                           | <b>697.22</b>                                                    | <b>16.16</b>                                         | <b>18.12</b>                                                      | <b>This study</b> |
| Xilin river                     | China        | Temperate | -                                                     | 2586                                                           | -                                                     | 4730                                                             | -                                                    | 20.96                                                             | [61]              |
| Rivers in Skogaryd catchment    | Sweden       | Boreal    | 131.60                                                | 1600                                                           | 1.70                                                  | 8800                                                             | -                                                    | -                                                                 | [79]              |
| Alaska streams                  | USA          | Boreal    | -                                                     | 450.14                                                         | -                                                     | 630.72                                                           | -                                                    | -                                                                 | [18]              |
| Forest and agricultural streams | Sweden       | Boreal    | -                                                     | -                                                              | -                                                     | -                                                                | 100                                                  | 533                                                               | [59]              |
